# Supplementary material for: Essential Oil Composition and Bioactivity of Two Juniper Species from Bulgaria and Slovakia
Source: MDPI journal article supplement (doi:10.3390/molecules26123659), 2021-06-15
Supplement: s1 [file s1]

# Essential oil composition and bioactivity of two Junipers species from Bulgaria and Slovakia

Valtcho D. Zheljazkov <sup>1\*</sup>, Charles L. Cantrell<sup>2</sup>, Ivanka Semerdjieva<sup>3</sup>, Tzenka Radoukova<sup>4</sup>, Albena Stoyanova<sup>5</sup>, Vasilina Maneva<sup>6</sup>, Miroslava Kačaniova<sup>7,8</sup>, Tess Astatkie<sup>9</sup>, Daniela Borisova<sup>10</sup>, Ivayla Dincheva<sup>11</sup>, Ivan Salamon<sup>12</sup>

## Supplemental Tables

**Supplemental Table 1.** Average concentration of volatile constituents (% in air-dried biomass) of *Juniperus excelsa* collected in Bulgaria.

| Constituent number                          | Volatile constituents of <i>J. excelsa</i> | RI   | BR1                                      | BR2   | IG1   | IG2   | KG1   |
|---------------------------------------------|--------------------------------------------|------|------------------------------------------|-------|-------|-------|-------|
| --- % of total oil by total peak area ----- |                                            |      |                                          |       |       |       |       |
| 1                                           | $\alpha$ -Thujene                          | 931  | 0.07                                     | 0.07  | 0.07  | 0.07  | 0.07  |
| 2                                           | $\alpha$ -Pinene                           | 939  | 20.4                                     | 21.31 | 19.71 | 22.53 | 20.32 |
| 3                                           | Camphene                                   | 953  | 0.40                                     | 0.42  | 0.43  | 0.39  | 0.44  |
| 4                                           | Sabinene                                   | 969  | 0.03                                     | 0.04  | 0.04  | 0.03  | 0.04  |
| 5                                           | $\beta$ -Pinene                            | 974  | 2.86                                     | 2.99  | 3.04  | 2.77  | 3.13  |
| 6                                           | $\beta$ -Myrcene                           | 991  | 0.05                                     | 0.05  | 0.05  | 0.05  | 0.05  |
| 7                                           | $\alpha$ -Terpinene                        | 1018 | 0.03                                     | 0.04  | 0.04  | 0.03  | 0.04  |
| 8                                           | $\alpha$ -Limonene                         | 1031 | 24.73                                    | 24.14 | 25.33 | 26.15 | 26.36 |
| 9                                           | $\gamma$ -Terpinene                        | 1062 | 0.23                                     | 0.25  | 0.25  | 0.23  | 0.26  |
| 10                                          | $\alpha$ -Terpinolene                      | 1088 | 0.17                                     | 0.18  | 0.18  | 0.16  | 0.19  |
| 11                                          | $\beta$ -Linalool                          | 1096 | 0.05                                     | 0.05  | 0.05  | 0.05  | 0.05  |
| 12                                          | Terpinen-4-ol                              | 1177 | 0.60                                     | 0.63  | 0.64  | 0.58  | 0.66  |
| 13                                          | $\alpha$ -Terpineol                        | 1189 | 0.33                                     | 0.35  | 0.36  | 0.33  | 0.37  |
| 14                                          | Bornyl acetate                             | 1285 | 0.11                                     | 0.12  | 0.12  | 0.12  | 0.13  |
| 15                                          | $\alpha$ -Cubebene                         | 1351 | 0.58                                     | 0.61  | 0.61  | 0.56  | 0.64  |
| 16                                          | $\alpha$ -Copaene                          | 1376 | 0.21                                     | 0.22  | 0.22  | 0.21  | 0.24  |
| 17                                          | $\beta$ -Bourbunene                        | 1384 | 0.10                                     | 0.10  | 0.10  | 0.09  | 0.11  |
| 18                                          | $\beta$ -Elemene                           | 1390 | 0.21                                     | 0.22  | 0.22  | 0.20  | 0.23  |
| 19                                          | $\beta$ -Caryophyllene                     | 1419 | 0.43                                     | 0.44  | 0.45  | 0.41  | 0.46  |
| 20                                          | $\gamma$ -Elemene                          | 1433 | 0.35                                     | 0.37  | 0.37  | 0.34  | 0.38  |
| 21                                          | $\alpha$ -Humulene                         | 1454 | 0.22                                     | 0.22  | 0.23  | 0.21  | 0.24  |
| 22                                          | $\gamma$ -Muurolene                        | 1479 | 0.06                                     | 0.06  | 0.06  | 0.06  | 0.07  |
| 23                                          | Germacrene D                               | 1480 | 2.18                                     | 2.28  | 2.30  | 2.12  | 2.39  |
| 24                                          | $\gamma$ -Cadinene                         | 1513 | 0.77                                     | 0.81  | 0.83  | 0.76  | 0.85  |
| 25                                          | $\delta$ -Cadinene                         | 1524 | 3.54                                     | 3.33  | 3.40  | 3.10  | 3.50  |
| 26                                          | Germacrene B                               | 1556 | 1.33                                     | 1.39  | 1.41  | 1.29  | 1.45  |
| 27                                          | Caryophyllene oxide                        | 1579 | 3.84                                     | 4.02  | 3.89  | 3.74  | 4.21  |
| 28                                          | $\alpha$ -Cedrol                           | 1598 | 30.83                                    | 31.71 | 32.33 | 29.09 | 29.79 |
| 29                                          | 1-epi-Cubenol                              | 1627 | 2.27                                     | 2.38  | 2.42  | 2.21  | 2.49  |
| <b>Class</b>                                |                                            |      | <b>% of total oil by total peak area</b> |       |       |       |       |
| Monoterpene hydrocarbons                    |                                            |      | 48.80                                    | 49.48 | 49.16 | 52.68 | 50.66 |

|                                       |              |              |              |              |              |
|---------------------------------------|--------------|--------------|--------------|--------------|--------------|
| Oxygenated monoterpenes               | 1.10         | 1.16         | 1.18         | 1.08         | 1.21         |
| <b>Total monoterpenes</b>             | <b>49.92</b> | <b>50.64</b> | <b>50.34</b> | <b>53.76</b> | <b>51.87</b> |
| Monocyclic sesquiterpene hydrocarbons | 8.80         | 9.20         | 9.41         | 8.57         | 9.66         |
| Bicyclic sesquiterpene hydrocarbons   | 5.03         | 4.89         | 4.98         | 4.55         | 5.13         |
| Tricyclic oxygenated sesquiterpenes   | 30.83        | 31.71        | 32.33        | 29.09        | 29.79        |
| Oxygenated bicyclic sesquiterpenes    | 2.27         | 2.376        | 2.42         | 2.21         | 2.49         |
| <b>Total sesquiterpenes</b>           | <b>46.95</b> | <b>48.18</b> | <b>49.14</b> | <b>44.42</b> | <b>47.08</b> |

Abbreviations of population: Bachkovo, Rodopi, without galbuli – BR1; Bachkovo, Rodopi with galbuli – BR2; IG Krichim, Rodopi with galbuli – IG1; Izgoryaloto Gyune, Rodopi without galbuli – IG2; Kresna gorge with galbuli – KG1.

**Supplemental Table 2.** Average concentration of volatile constituents (% of total oil in dried biomass) of *Juniperus sabina* collected in Bulgaria and in Slovakia.

| Constituent number                      | Volatile constituents of <i>J. sabina</i> | RI   | Zvolen, SK | BI1   | BI2   | KB    |
|-----------------------------------------|-------------------------------------------|------|------------|-------|-------|-------|
| -- % of total oil by total peak area -- |                                           |      |            |       |       |       |
| 1                                       | 1-Hexanal                                 | 809  | 0.22       | 0.23  | 0.24  | 0.23  |
| 2                                       | 2-Hexen-1-al                              | 860  | 0.03       | 0.03  | 0.03  | 0.03  |
| 3                                       | 3-Hexen-1-ol                              | 868  | 0.04       | 0.04  | 0.04  | 0.03  |
| 4                                       | $\alpha$ -Thujene                         | 931  | 1.45       | 1.47  | 1.57  | 1.51  |
| 5                                       | $\alpha$ -Pinene                          | 939  | 1.89       | 1.94  | 2.06  | 1.97  |
| 6                                       | Camphene                                  | 953  | 0.07       | 0.07  | 0.08  | 0.07  |
| 7                                       | Sabinene                                  | 969  | 24.45      | 28.22 | 16.68 | 30.98 |
| 8                                       | $\beta$ -Pinene                           | 974  | 0.15       | 0.15  | 0.16  | 0.15  |
| 9                                       | $\beta$ -Myrcene                          | 991  | 2.61       | 2.66  | 2.84  | 2.72  |
| 10                                      | $\alpha$ -Terpinene                       | 1018 | 0.32       | 0.33  | 0.35  | 0.34  |
| 11                                      | p-Cymene                                  | 1025 | 1.79       | 1.83  | 1.95  | 1.88  |
| 12                                      | Limonene                                  | 1031 | 1.93       | 1.96  | 2.09  | 2.00  |
| 13                                      | $\beta$ -Ocimene                          | 1050 | 0.44       | 0.45  | 0.48  | 0.46  |
| 14                                      | $\gamma$ -Terpinene                       | 1062 | 0.51       | 0.53  | 0.56  | 0.53  |
| 15                                      | <i>cis</i> -Sabinene hydrate              | 1068 | 0.88       | 0.90  | 0.96  | 0.92  |
| 16                                      | $\alpha$ -Terpinolene                     | 1088 | 0.43       | 0.44  | 0.05  | 0.88  |
| 17                                      | $\beta$ -Linalool                         | 1096 | 0.12       | 0.23  | 1.10  | 0.12  |
| 18                                      | <i>trans</i> Sabinene hydrate             | 1098 | 0.64       | 0.65  | 0.70  | 0.67  |
| 19                                      | <i>cis</i> -Thujone                       | 1102 | 0.20       | 0.21  | 0.21  | 0.21  |
| 20                                      | <i>trans</i> -Thujone                     | 1114 | 0.11       | 0.12  | 0.12  | 0.12  |
| 21                                      | Terpinen-4-ol                             | 1177 | 9.25       | 12.41 | 10.66 | 13.63 |
| 22                                      | $\beta$ -Citronellol                      | 1225 | 0.87       | 0.88  | 0.94  | 0.90  |
| 23                                      | Linalyl acetate                           | 1257 | 0.25       | 0.25  | 0.27  | 0.25  |
| 24                                      | (S)-(-)- Methyl citronellate              | 1262 | 4.55       | 4.64  | 4.94  | 4.74  |
| 25                                      | Bornyl acetate                            | 1285 | 0.12       | 0.12  | 0.13  | 0.12  |
| 26                                      | Myrtenyl acetate                          | 1298 | 20.81      | 1.32  | 23.02 | 2.78  |
| 27                                      | $\delta$ -Elemene                         | 1338 | 0.32       | 0.32  | 0.34  | 0.33  |
| 28                                      | Methyl eugenol                            | 1357 | 0.06       | 13.49 | 0.06  | 0.06  |
| 29                                      | $\beta$ -Elemene                          | 1390 | 0.29       | 0.29  | 0.31  | 0.30  |

|                                       |                        |                                          |              |              |              |       |
|---------------------------------------|------------------------|------------------------------------------|--------------|--------------|--------------|-------|
| 30                                    | $\beta$ -Caryophyllene | 1419                                     | 0.11         | 0.10         | 0.16         | 0.27  |
| 31                                    | $\gamma$ -Elemene      | 1433                                     | 0.49         | 0.50         | 0.53         | 0.51  |
| 32                                    | $\alpha$ -Humulene     | 1454                                     | 0.20         | 0.21         | 0.22         | 0.21  |
| 33                                    | $\gamma$ -Muurolene    | 1479                                     | 0.09         | 0.08         | 0.09         | 0.09  |
| 34                                    | Germacrene D           | 1480                                     | 0.81         | 0.83         | 0.88         | 0.85  |
| 35                                    | $\alpha$ -Muurolene    | 1500                                     | 0.27         | 0.27         | 0.29         | 0.28  |
| 36                                    | $\gamma$ -Cadinene     | 1513                                     | 0.64         | 0.65         | 0.70         | 0.67  |
| 37                                    | $\delta$ -Cadinene     | 1524                                     | 1.63         | 1.67         | 1.77         | 1.70  |
| 38                                    | $\alpha$ -Cadinene     | 1538                                     | 0.53         | 0.54         | 0.57         | 0.55  |
| 39                                    | Elemol                 | 1549                                     | 12.18        | 8.45         | 13.23        | 13.70 |
| 40                                    | Germacrene-D-4-ol      | 1575                                     | 0.13         | 0.13         | 0.56         | 0.13  |
| 41                                    | Spathulenol            | 1578                                     | 0.51         | 0.52         | 0.55         | 0.53  |
| 42                                    | $\gamma$ -Eudesmol     | 1632                                     | 0.68         | 0.69         | 0.73         | 0.70  |
| 43                                    | $\beta$ -Eudesmol      | 1651                                     | 0.54         | 0.56         | 0.59         | 0.56  |
| 44                                    | $\alpha$ -Cadinol      | 1641                                     | 3.47         | 3.54         | 3.77         | 3.62  |
| 45                                    | $\alpha$ -Eudesmol     | 1654                                     | 0.61         | 0.62         | 0.66         | 0.63  |
| 46                                    | Sclarene               | 1974                                     | 0.38         | 1.38         | 0.41         | 1.24  |
| <b>Class</b>                          |                        | <b>% of total oil by total peak area</b> |              |              |              |       |
| Oxygenated aliphatic                  |                        | 0.29                                     | 0.29         | 0.31         | 0.30         |       |
| Monoterpene hydrocarbons              |                        | 34.26                                    | 38.00        | 26.92        | 41.50        |       |
| Oxygenated monoterpenes               |                        | 31.72                                    | 15.55        | 36.50        | 18.15        |       |
| Other monoterpenes                    |                        | 7.23                                     | 7.70         | 7.21         | 8.20         |       |
| <b>Total monoterpenes</b>             |                        | <b>73.20</b>                             | <b>61.26</b> | <b>70.63</b> | <b>67.94</b> |       |
| Monocyclic sesquiterpene hydrocarbons |                        | 14.22                                    | 10.52        | 15.88        | 15.81        |       |
| Bicyclic sesquiterpene hydrocarbons   |                        | 3.46                                     | 3.53         | 3.76         | 3.78         |       |
| Oxygenated bicyclic sesquiterpenes    |                        | 5.29                                     | 5.40         | 5.75         | 5.51         |       |
| Other sesquiterpenes                  |                        | 0.51                                     | 0.52         | 0.55         | 0.52         |       |
| <b>Total sesquiterpenes</b>           |                        | <b>23.48</b>                             | <b>19.97</b> | <b>25.96</b> | <b>25.63</b> |       |
| Phenylpropanoid compound              |                        | 0.06                                     | 13.50        | 0.07         | 0.07         |       |

Abbreviations of populations: Zvolen, Slovakia, M – CK; Beli Iskar, M – BI1; Beli Iskar, F – BI2; Krushovska bara, Stara planina, M – KB.
